# Supplementary material
Source: PubMed Central journal article supplement (PMC4245851)
Supplement: Supp_Table1.pdf [file Supp_Table1.pdf]

## Supplementary Data

SUPPLEMENTARY TABLE S1. ARTICLES PUBLISHED BY DR. HELMUT SIES CITED AT LEAST 1000 TIMES

|                 | <i>Publication</i>                                                                                                                                                               | <i>Total citations as of 6/30/2014</i> |
|-----------------|----------------------------------------------------------------------------------------------------------------------------------------------------------------------------------|----------------------------------------|
| 1. <sup>a</sup> | Chance B, Sies H and Boveris A.<br>Hydroperoxide metabolism in mammalian organs.<br><i>Physiol Rev</i> 59: 527–605, 1979. (Review)                                               | 5151                                   |
| 2.              | Di Mascio P, Kaiser S, and Sies H. Lycopene<br>as the most efficient biological carotenoid<br>singlet oxygen quencher. <i>Arch Biochem<br/>Biophys</i> 274: 532–538, 1989.       | 1725                                   |
| 3.              | Sies H. Oxidative stress: oxidants and antioxidants.<br><i>Exp Physiol</i> 82: 291–295, 1997. (Review)                                                                           | 1590                                   |
| 4.              | Sies H. Strategies of antioxidant defense.<br><i>Eur J Biochem</i> 215: 213–219, 1993. (Review)                                                                                  | 1491                                   |
| 5.              | Akerboom TP and Sies H. Assay of glutathione,<br>glutathione disulfide, and glutathione mixed<br>disulfides in biological samples. <i>Methods<br/>Enzymol</i> 77: 373–382, 1981. | 1267                                   |
| 6.              | Sies H. Glutathione and its role in cellular<br>functions. <i>Free Radic Biol Med</i> 27: 916–921, 1999. (Review)                                                                | 1070                                   |

<sup>a</sup>Considered by authors as coequal contributor.
