# Supplementary material
Source: PubMed Central journal article supplement (PMC4245851)
Supplement: Supp_Table2.pdf [file Supp_Table2.pdf]

|     | Publication                                                                                                                                                                                                                              | Total citations<br>as of<br>6/30/2014 |
|-----|------------------------------------------------------------------------------------------------------------------------------------------------------------------------------------------------------------------------------------------|---------------------------------------|
| 1.  | Chance B, Sies H, and Boveris A. Hydroperoxide metabolism in mammalian organs. <i>Physiol Rev</i> 59: 527–605, 1979.                                                                                                                     | 5151                                  |
| 2.  | Di Mascio P, Kaiser S, and Sies H. Lycopene as the most efficient biological carotenoid singlet oxygen quencher. <i>Arch Biochem Biophys</i> 274: 532–538, 1989.                                                                         | 1725                                  |
| 3.  | Sies H. Oxidative stress: oxidants and antioxidants. <i>Exp Physiol</i> 82: 291–295, 1997.                                                                                                                                               | 1590                                  |
| 4.  | Sies H. Strategies of antioxidant defense. <i>Eur J Biochem</i> 215: 213–219, 1993. (Review)                                                                                                                                             | 1491                                  |
| 5.  | Akerboom TP and Sies H. Assay of glutathione, glutathione disulfide, and glutathione mixed disulfides in biological samples. <i>Methods Enzymol</i> 77: 373–382, 1981.                                                                   | 1267                                  |
| 6.  | Sies H. Glutathione and its role in cellular functions. <i>Free Radic Biol Med</i> 27: 916–921, 1999.                                                                                                                                    | 1070                                  |
| 7.  | Sies H. Biochemistry of oxidative stress. <i>Angew Chem Int Ed</i> 25: 1058–1071, 1986.                                                                                                                                                  | 977                                   |
| 8.  | Sies H. Oxidative stress: from basic research to clinical application. <i>Am J Med</i> 91: 31S–38S, 1991.                                                                                                                                | 890                                   |
| 9.  | Sies H and Stahl W. Vitamins E and C, beta-carotene, and other carotenoids as antioxidants. <i>Am J Clin Nutr</i> 62: 1315S–1321S, 1995.                                                                                                 | 886                                   |
| 10. | Mughesh G, du Mont WW, and Sies H. Chemistry of biologically important synthetic organoselenium compounds. <i>Chem Rev</i> 101: 2125–2179, 2001.                                                                                         | 818                                   |
| 11. | Sies H, Stahl W, and Sundquist AR. Antioxidant functions of vitamins. Vitamins E and C, beta-carotene, and other carotenoids. <i>Am N Y Acad Sci</i> 669: 7–20, 1992.                                                                    | 673                                   |
| 12. | Di Mascio P, Murphy ME, and Sies H. Antioxidant defense systems: the role of carotenoids, tocopherols, and thiols. <i>Am J Clin Nutr</i> 53: 194S–200S, 1991.                                                                            | 671                                   |
| 13. | Kappus H and Sies H. Toxic drug effects associated with oxygen metabolism: redox cycling and lipid peroxidation. <i>Experientia</i> 37: 1233–1241, 1981.                                                                                 | 612                                   |
| 14. | Muller A, Cadenas E, Graf P, and Sies H. A novel biologically active seleno-organic compound—I. Glutathione peroxidase-like activity in vitro and antioxidant capacity of PZ 51 (Ebselen). <i>Biochem Pharmacol</i> 33: 3235–3239, 1984. | 583                                   |
| 15. | Stahl W and Sies H. Uptake of lycopene and its geometrical isomers is greater from heat-processed than from unprocessed tomato juice in humans. <i>J Nutr</i> 122: 2161–2166, 1992.                                                      | 563                                   |
| 16. | Stahl W and Sies H. Lycopene: a biologically important carotenoid for humans? <i>Arch Biochem Biophys</i> 336: 1–9, 1996.                                                                                                                | 541                                   |
| 17. | Gartner C, Stahl W, and Sies H. Lycopene is more bioavailable from tomato paste than from fresh tomatoes. <i>Am J Clin Nutr</i> 66: 116–122, 1997.                                                                                       | 524                                   |
| 18. | Steffen Y, Schewe T, and Sies H. (-)-Epicatechin elevates nitric oxide in endothelial cells via inhibition of NADPH oxidase. <i>Biochem Biophys Res Commun</i> 359: 828–833, 2007.                                                       | 520                                   |
| 19. | Sies H. What is oxidative stress?: Springer, 2000.                                                                                                                                                                                       | 451                                   |
| 20. | Traber MG and Sies H. Vitamin E in humans: demand and delivery. <i>Annu Rev Nutr</i> 16: 321–347, 1996.                                                                                                                                  | 434                                   |
| 21. | Sies H, Sharov VS, Klotz LO, and Briviba K. Glutathione peroxidase protects against peroxynitrite-mediated oxidations. A new function for selenoproteins as peroxynitrite reductase. <i>J Biol Chem</i> 272: 27812–27817, 1997.          | 409                                   |
| 22. | Stahl W and Sies H. Bioactivity and protective effects of natural carotenoids. <i>Biochim Biophys Acta</i> 1740: 101–107, 2005.                                                                                                          | 374                                   |
| 23. | Jacob C, Giles GI, Giles NM, and Sies H. Sulfur and selenium: the role of oxidation state in protein structure and function. <i>Angew Chem Int Ed Engl</i> 42: 4742–4758, 2003.                                                          | 372                                   |

(continued)

TABLE S2. (CONTINUED)

|     | Publication                                                                                                                                                                                                                                                                                               | Total citations<br>as of<br>6/30/2014 |
|-----|-----------------------------------------------------------------------------------------------------------------------------------------------------------------------------------------------------------------------------------------------------------------------------------------------------------|---------------------------------------|
| 24. | Brigelius R, Muckel C, Akerboom TP, and Sies H. Identification and quantitation of glutathione in hepatic protein mixed disulfides and its relationship to glutathione disulfide. <i>Biochem Pharmacol</i> 32: 2529–2534, 1983.                                                                           | 351                                   |
| 25. | Wefers H and Sies H. The protection by ascorbate and glutathione against microsomal lipid peroxidation is dependent on vitamin E. <i>Eur J Biochem</i> 174: 353–357, 1988.                                                                                                                                | 351                                   |
| 26. | Stahl W and Sies H. Antioxidant activity of carotenoids. <i>Mol Aspects Med</i> 24: 345–351, 2003.                                                                                                                                                                                                        | 349                                   |
| 27. | Sies H. Ebselen, a selenoorganic compound as glutathione peroxidase mimic. <i>Free Radic Biol Med</i> 14: 313–323, 1993.                                                                                                                                                                                  | 320                                   |
| 28. | Murphy ME and Sies H. Reversible conversion of nitroxyl anion to nitric oxide by superoxide dismutase. <i>Proc Natl Acad Sci U S A</i> 88: 10860–10864, 1991.                                                                                                                                             | 319                                   |
| 29. | Heiss C, Dejam A, Kleinbongard P, Schewe T, Sies H, and Kelm M. Vascular effects of cocoa rich in flavan-3-ols. <i>JAMA</i> 290: 1030–1031, 2003.                                                                                                                                                         | 313                                   |
| 30. | Stahl W, Schwarz W, Sundquist AR, and Sies H. cis-trans isomers of lycopene and beta-carotene in human serum and tissues. <i>Arch Biochem Biophys</i> 294: 173–177, 1992.                                                                                                                                 | 306                                   |
| 31. | Sies H, Stahl W, and Sevanian A. Nutritional, dietary and postprandial oxidative stress. <i>J Nutr</i> 135: 969–972, 2005.                                                                                                                                                                                | 305                                   |
| 32. | Berneburg M, Grether-Beck S, Kurten V, Ruzicka T, Briviba K, Sies H, and Krutmann J. Singlet oxygen mediates the UVA-induced generation of the photoaging-associated mitochondrial common deletion. <i>J Biol Chem</i> 274: 15345–15349, 1999.                                                            | 298                                   |
| 33. | Devasagayam TP, Steenken S, Obendorf MS, Schulz WA, and Sies H. Formation of 8-hydroxy(deoxy)guanosine and generation of strand breaks at guanine residues in DNA by singlet oxygen. <i>Biochemistry</i> 30: 6283–6289, 1991.                                                                             | 287                                   |
| 34. | Arteel GE, Briviba K, and Sies H. Protection against peroxynitrite. <i>FEBS Lett</i> 445: 226–230, 1999.                                                                                                                                                                                                  | 280                                   |
| 35. | Stahl W, Jungmans A, de Boer B, Driomina ES, Briviba K, and Sies H. Carotenoid mixtures protect multilamellar liposomes against oxidative damage: synergistic effects of lycopene and lutein. <i>FEBS Lett</i> 427: 305–308, 1998.                                                                        | 279                                   |
| 36. | Stahl W, Heinrich U, Jungmann H, Sies H, and Tromnier H. Carotenoids and carotenoids plus vitamin E protect against ultraviolet light-induced erythema in humans. <i>Am J Clin Nutr</i> 71: 795–798, 2000.                                                                                                | 274                                   |
| 37. | Oshino N, Chance B, Sies H, and Bucher T. The role of H <sub>2</sub> O <sub>2</sub> generation in perfused rat liver and the reaction of catalase compound I and hydrogen donors. <i>Arch Biochem Biophys</i> 154: 117–131, 1973.                                                                         | 274                                   |
| 38. | Sies H and Summer KH. Hydroperoxide-metabolizing systems in rat liver. <i>Eur J Biochem</i> 57: 503–512, 1975.                                                                                                                                                                                            | 273                                   |
| 39. | Hathcock JN, Azzi A, Blumberg J, Bray T, Dickinson A, Frei B, Jialal I, Johnston CS, Kelly FJ, Kraemer K, Packer L, Parthasarathy S, Sies H, and Traber MG. Vitamins E and C are safe across a broad range of intakes. <i>Am J Clin Nutr</i> 81: 736–745, 2005.                                           | 258                                   |
| 40. | Plummer JL, Smith BR, Sies H, and Bend JR. Chemical depletion of glutathione in vivo. <i>Methods Enzymol</i> 77: 50–59, 1981.                                                                                                                                                                             | 240                                   |
| 41. | Cadenas E and Sies H. Low-level chemiluminescence as an indicator of singlet molecular oxygen in biological systems. <i>Methods Enzymol</i> 105: 221–231, 1984.                                                                                                                                           | 236                                   |
| 42. | Sies H. The use of perfusion of liver and other organs for the study of microsomal electron-transport and cytochrome P-450 systems. <i>Methods Enzymol</i> 52: 48–59, 1978.                                                                                                                               | 231                                   |
| 43. | Morita A, Werfel T, Stege H, Ahrens C, Karmann K, Grewe M, Grether-Beck S, Ruzicka T, Kapp A, Klotz LO, Sies H, and Krutmann J. Evidence that singlet oxygen-induced human T helper cell apoptosis is the basic mechanism of ultraviolet-A radiation phototherapy. <i>J Exp Med</i> 186: 1763–1768, 1997. | 228                                   |
| 44. | Heiss C, Kleinbongard P, Dejam A, Perre S, Schroeter H, Sies H, and Kelm M. Acute consumption of flavanol-rich cocoa and the reversal of endothelial dysfunction in smokers. <i>J Am Coll Cardiol</i> 46: 1276–1283, 2005.                                                                                | 228                                   |
| 45. | Sies H, Gerstenecker C, Menzel H, and Flohe L. Oxidation in the NADP system and release of GSSG from hemoglobin-free perfused rat liver during peroxidative oxidation of glutathione by hydroperoxides. <i>FEBS Lett</i> 27: 171–175, 1972.                                                               | 223                                   |

(continued)

TABLE S2. (CONTINUED)

|     | Publication                                                                                                                                                                                                                                                                                                                                                                                                       | Total citations<br>as of<br>6/30/2014 |
|-----|-------------------------------------------------------------------------------------------------------------------------------------------------------------------------------------------------------------------------------------------------------------------------------------------------------------------------------------------------------------------------------------------------------------------|---------------------------------------|
| 46. | Mecocci P, Polidori MC, Troiano L, Cherubini A, Cecchetti R, Pini G, Straatman M, Monti D, Stahl W, Sies H, Franceschi C, and Senin U. Plasma antioxidants and longevity: a study on healthy centenarians. <i>Free Radic Biol Med</i> 28: 1243–1248, 2000.                                                                                                                                                        | 223                                   |
| 47. | Stahl W and Sies H. Antioxidant defense: vitamins E and C and carotenoids. <i>Diabetes</i> 46 Suppl 2: S14–S18, 1997.                                                                                                                                                                                                                                                                                             | 218                                   |
| 48. | Arteel GE and Sies H. The biochemistry of selenium and the glutathione system. <i>Environ Toxicol Pharmacol</i> 10: 153–158, 2001.                                                                                                                                                                                                                                                                                | 217                                   |
| 49. | Sies H and Akerboom TP. Glutathione disulfide (GSSG) efflux from cells and tissues. <i>Methods Enzymol</i> 105: 445–451, 1984.                                                                                                                                                                                                                                                                                    | 216                                   |
| 50. | Fritsch C, Horney B, Stahl W, Lehmann P, Ruzicka T, and Sies H. Preferential relative porphyrin enrichment in solar keratoses upon topical application of delta-aminolevulinic acid methyl ester. <i>Photochem Photobiol</i> 68: 218–221, 1998.                                                                                                                                                                   | 208                                   |
| 51. | Grether-Beck S, Olaiwola-Horn S, Schmitt H, Grewe M, Jahnke A, Johnson JP, Briviba K, Sies H, and Krutmann J. Activation of transcription factor AP-2 mediates UVA radiation- and singlet oxygen-induced expression of the human intercellular adhesion molecule 1 gene. <i>Proc Natl Acad Sci U S A</i> 93: 14586–14591, 1996.                                                                                   | 207                                   |
| 52. | Brenneisen P, Sies H, and Scharfetter-Kochanek K. Ultraviolet-B irradiation and matrix metalloproteinases: from induction via signaling to initial events. <i>Am N Y Acad Sci</i> 973: 31–43, 2002.                                                                                                                                                                                                               | 204                                   |
| 53. | Wlaschek M, Briviba K, Stricklin GP, Sies H, and Scharfetter-Kochanek K. Singlet oxygen may mediate the ultraviolet A-induced synthesis of interstitial collagenase. <i>J Invest Dermatol</i> 104: 194–198, 1995.                                                                                                                                                                                                 | 199                                   |
| 54. | Ishikawa T and Sies H. Cardiac transport of glutathione disulfide and S-conjugate. Studies with isolated perfused rat heart during hydroperoxide metabolism. <i>J Biol Chem</i> 259: 3838–3843, 1984.                                                                                                                                                                                                             | 197                                   |
| 55. | Sies H and Stahl W. Nutritional protection against skin damage from sunlight. <i>Annu Rev Nutr</i> 24: 173–200, 2004.                                                                                                                                                                                                                                                                                             | 193                                   |
| 56. | Sadik CD, Sies H, and Schewe T. Inhibition of 15-lipoxygenases by flavonoids: structure-activity relations and mode of action. <i>Biochem Pharmacol</i> 65: 773–781, 2003.                                                                                                                                                                                                                                        | 193                                   |
| 57. | Storz G, Christman MF, Sies H, and Ames BN. Spontaneous mutagenesis and oxidative damage to DNA in <i>Salmonella typhimurium</i> . <i>Proc Natl Acad Sci U S A</i> 84: 8917–8921, 1987.                                                                                                                                                                                                                           | 192                                   |
| 58. | Brenneisen P, Wenk J, Klotz LO, Wlaschek M, Briviba K, Krieg T, Sies H, and Scharfetter-Kochanek K. Central role of ferrous/ferric iron in the ultraviolet B irradiation-mediated signaling pathway leading to increased interstitial collagenase (matrix-degrading metalloprotease (MMP)-1) and stromelysin-1 (MMP-3) mRNA levels in cultured human dermal fibroblasts. <i>J Biol Chem</i> 273: 5279–5287, 1998. | 190                                   |
| 59. | Wefers H and Sies H. Hepatic low-level chemiluminescence during redox cycling of menadione and the menadione-glutathione conjugate: relation to glutathione and NAD(P)H:quinone reductase (DT-diaphorase) activity. <i>Arch Biochem Biophys</i> 224: 568–578, 1983.                                                                                                                                               | 190                                   |
| 60. | Parnham M and Sies H. Ebselen: prospective therapy for cerebral ischaemia. <i>Expert Opin Investig Drugs</i> 9: 607–619, 2000.                                                                                                                                                                                                                                                                                    | 189                                   |
| 61. | Steinbrenner H and Sies H. Protection against reactive oxygen species by selenoproteins. <i>Biochim Biophys Acta</i> 1790: 1478–1485, 2009.                                                                                                                                                                                                                                                                       | 188                                   |
| 62. | Wefers H and Sies H. Oxidation of glutathione by the superoxide radical to the disulfide and the sulfonate yielding singlet oxygen. <i>Eur J Biochem</i> 137: 29–36, 1983.                                                                                                                                                                                                                                        | 184                                   |
| 63. | Klotz LO, Kroneske KD, Buchczyk DP, and Sies H. Role of copper, zinc, selenium and tellurium in the cellular defense against oxidative and nitrosative stress. <i>J Nutr</i> 133: 1448S–1451S, 2003.                                                                                                                                                                                                              | 184                                   |
| 64. | Polidori MC, Stahl W, Eichler O, Niestroj I, and Sies H. Profiles of antioxidants in human plasma. <i>Free Radic Biol Med</i> 30: 456–462, 2001.                                                                                                                                                                                                                                                                  | 181                                   |
| 65. | Klotz LO, Pellieux C, Briviba K, Pierlot C, Aubry JM, and Sies H. Mitogen-activated protein kinase (p38-, JNK-, ERK-) activation pattern induced by extracellular and intracellular singlet oxygen and UVA. <i>Eur J Biochem</i> 260: 917–922, 1999.                                                                                                                                                              | 176                                   |
| 66. | Stahl W, Heinrich U, Wiseman S, Eichler O, Sies H, and Tronnier H. Dietary tomato paste protects against ultraviolet light-induced erythema in humans. <i>J Nutr</i> 131: 1449–1451, 2001.                                                                                                                                                                                                                        | 175                                   |
| 67. | Ishikawa T, Esterbauer H, and Sies H. Role of cardiac glutathione transferase and of the glutathione S-conjugate export system in biotransformation of 4-hydroxynonenal in the heart. <i>J Biol Chem</i> 261: 1576–1581, 1986.                                                                                                                                                                                    | 173                                   |

(continued)

TABLE S2. (CONTINUED)

|     | Publication                                                                                                                                                                                                                                                        | Total citations<br>as of<br>6/30/2014 |
|-----|--------------------------------------------------------------------------------------------------------------------------------------------------------------------------------------------------------------------------------------------------------------------|---------------------------------------|
| 68. | Wahllander A, Soboll S, Sies H, Linke I, and Muller M. Hepatic mitochondrial and cytosolic glutathione content and the subcellular distribution of GSH-S-transferases. <i>FEBS Lett</i> 97: 138-140, 1979.                                                         | 172                                   |
| 69. | Bartoli GM and Sies H. Reduced and oxidized glutathione efflux from liver. <i>FEBS Lett</i> 86: 89-91, 1978.                                                                                                                                                       | 170                                   |
| 70. | Heinrich U, Gartner C, Wiebusch M, Eichler O, Sies H, Tronnier H, and Stahl W. Supplementation with beta-carotene or a similar amount of mixed carotenoids protects humans from UV-induced erythema. <i>J Nutr</i> 133: 98-101, 2003.                              | 166                                   |
| 71. | Cadenas E and Sies H. Low level chemiluminescence of liver microsomal fractions initiated by tert-butyl hydroperoxide. Relation to microsomal hemoproteins, oxygen dependence, and lipid peroxidation. <i>Eur J Biochem</i> 124: 349-356, 1982.                    | 166                                   |
| 72. | Sies H and Menck CF. Singlet oxygen induced DNA damage. <i>Mutat Res</i> 275: 367-375, 1992.                                                                                                                                                                       | 164                                   |
| 73. | Sies H, Schewe T, Heiss C, and Kelm M. Cocoa polyphenols and inflammatory mediators. <i>Am J Clin Nutr</i> 81: 304S-312S, 2005.                                                                                                                                    | 163                                   |
| 74. | Ribeiro DT, Madzak C, Sarasin A, Di Mascio P, Sies H, and Menck CF. Singlet oxygen induced DNA damage and mutagenicity in a single-stranded SV40-based shuttle vector. <i>Photochem Photobiol</i> 55: 39-45, 1992.                                                 | 161                                   |
| 75. | Brenneisen P, Steinbrenner H, and Sies H. Selenium, oxidative stress, and health aspects. <i>Mol Aspects Med</i> 26: 256-267, 2005.                                                                                                                                | 160                                   |
| 76. | Steffen Y, Gruber C, Schewe T, and Sies H. Mono-O-methylated flavanols and other flavonoids as inhibitors of endothelial NADPH oxidase. <i>Arch Biochem Biophys</i> 469: 209-219, 2008.                                                                            | 158                                   |
| 77. | Sies H, Koch OR, Martino E, and Boveris A. Increased biliary glutathione disulfide release in chronically ethanol-treated rats. <i>FEBS Lett</i> 103: 287-290, 1979.                                                                                               | 157                                   |
| 78. | Ji Y, Akerboom TP, Sies H, and Thomas JA. S-nitrosylation and S-glutathiolation of protein sulfhydryls by S-nitroso glutathione. <i>Arch Biochem Biophys</i> 362: 67-78, 1999.                                                                                     | 157                                   |
| 79. | Cadenas E, Simic MG, and Sies H. Antioxidant activity of 5-hydroxytryptophan, 5-hydroxyindole, and DOPA against microsomal lipid peroxidation and its dependence on vitamin E. <i>Free Radic Res Commun</i> 6: 11-17, 1989.                                        | 154                                   |
| 80. | Scholich H, Murphy ME, and Sies H. Antioxidant activity of dihydrolipoate against microsomal lipid peroxidation and its dependence on alpha-tocopherol. <i>Biochim Biophys Acta</i> 1001: 256-261, 1989.                                                           | 154                                   |
| 81. | Schulz WA, Krummeck A, Rosinger I, Eickelmann P, Neuhaus C, Ebert T, Schmitz-Drager BJ, and Sies H. Increased frequency of a null-allele for NAD(P)H: quinone oxidoreductase in patients with urological malignancies. <i>Pharmacogenetics</i> 7: 235-239, 1997.   | 152                                   |
| 82. | Sies H and Murphy ME. Role of tocopherols in the protection of biological systems against oxidative damage. <i>J Photochem Photobiol B</i> 8: 211-218, 1991.                                                                                                       | 151                                   |
| 83. | Briviba K and Sies H. Nonenzymatic antioxidant defense systems. <i>Natural Antioxidants in Human Health and Disease</i> , edited by Frei B. San Diego, CA: Academic Press, 1994, pp. 107-128.                                                                      | 150                                   |
| 84. | Arteel GE and Sies H. Protection against peroxynitrite by cocoa polyphenol oligomers. <i>FEBS Lett</i> 462: 167-170, 1999.                                                                                                                                         | 149                                   |
| 85. | Di Mascio P and Sies H. Quantification of singlet oxygen generated by thermolysis of 3,3'-(1,4-naphthylene)dipropionate endoperoxide. Monomol and dimol photoemission and the effects of 1,4-diazabicyclo[2.2.2]octane. <i>J Am Chem Soc</i> 111: 2909-2914, 1989. | 146                                   |
| 86. | Sies H and Stahl W. Lycopene: antioxidant and biological effects and its bioavailability in the human. <i>Proc Soc Exp Biol Med</i> 218: 121-124, 1998.                                                                                                            | 146                                   |
| 87. | Sies H and Graf P. Hepatic thiol and glutathione efflux under the influence of vasopressin, phenylephrine and adrenaline. <i>Biochem J</i> 226: 545-549, 1985.                                                                                                     | 145                                   |
| 88. | Kaiser S, Di Mascio P, Murphy ME, and Sies H. Physical and chemical scavenging of singlet molecular oxygen by tocopherols. <i>Arch Biochem Biophys</i> 277: 101-108, 1990.                                                                                         | 144                                   |
| 89. | Stahl W, Nicolai S, Briviba K, Hanusch M, Broszeit G, Peters M, Martin HD, and Sies H. Biological activities of natural and synthetic carotenoids: induction of gap junctional communication and singlet oxygen quenching. <i>Carcinogenesis</i> 18: 89-92, 1997.  | 144                                   |
| 90. | Masumoto H and Sies H. The reaction of ebselen with peroxynitrite. <i>Chem Res Toxicol</i> 9: 262-267, 1996.                                                                                                                                                       | 143                                   |

(continued)

TABLE S2. (CONTINUED)

|      | Publication                                                                                                                                                                                                                                                                                                                                                                                                                                     | Total citations<br>as of<br>6/30/2014 |
|------|-------------------------------------------------------------------------------------------------------------------------------------------------------------------------------------------------------------------------------------------------------------------------------------------------------------------------------------------------------------------------------------------------------------------------------------------------|---------------------------------------|
| 91.  | Epe B, Ballmaier D, Roussyn I, Briviba K, and Sies H. DNA damage by peroxynitrite characterized with DNA repair enzymes. <i>Nucleic Acids Res</i> 24: 4105–4110, 1996.                                                                                                                                                                                                                                                                          | 142                                   |
| 92.  | Masumoto H, Kissner R, Koppenol WH, and Sies H. Kinetic study of the reaction of ebselen with peroxynitrite. <i>FEBS Lett</i> 398: 179–182, 1996.                                                                                                                                                                                                                                                                                               | 139                                   |
| 93.  | Bucher T, Brauser B, Conze A, Klein F, Langguth O, and Sies H. State of oxidation-reduction and state of binding in the cytosolic NADH-system as disclosed by equilibration with extracellular lactate-pyruvate in hemoglobin-free perfused rat liver. <i>Eur J Biochem</i> 27: 301–317, 1972.                                                                                                                                                  | 139                                   |
| 94.  | Possel H, Noack H, Putzke J, Wolf G, and Sies H. Selective upregulation of inducible nitric oxide synthase (iNOS) by lipopolysaccharide (LPS) and cytokines in microglia: in vitro and in vivo studies. <i>Glia</i> 32: 51–59, 2000.                                                                                                                                                                                                            | 133                                   |
| 95.  | Klotz LO and Sies H. Defenses against peroxynitrite: selenocompounds and flavonoids. <i>Toxicol Lett</i> 140–141: 125–132, 2003.                                                                                                                                                                                                                                                                                                                | 132                                   |
| 96.  | Beutner S, Bloedorn B, Frixel S, Hernandez Blanco I, Hoffmann T, Martin H-D, Mayer B, Noack P, Ruck C, Schmidt M, Schülke I, Sell S, Ernst H, Haremza S, Seybold G, Sies H, Stahl W, and Walsh R. Quantitative assessment of antioxidant properties of natural colorants and phytochemicals: carotenoids, flavonoids, phenols and indigoids. The role of $\beta$ -carotene in antioxidant functions. <i>J Sci Food Agric</i> 81: 559–568, 2001. | 132                                   |
| 97.  | Schewe T, Steffen Y, and Sies H. How do dietary flavanols improve vascular function? A position paper. <i>Arch Biochem Biophys</i> 476: 102–106, 2008.                                                                                                                                                                                                                                                                                          | 132                                   |
| 98.  | Stahl W, von Laar J, Martin HD, Emmerich T, and Sies H. Stimulation of gap junctional communication: comparison of acyclo-retinoic acid and lycopene. <i>Arch Biochem Biophys</i> 373: 271–274, 2000.                                                                                                                                                                                                                                           | 131                                   |
| 99.  | Sies H and Arteel GE. Interaction of peroxynitrite with selenoproteins and glutathione peroxidase mimics. <i>Free Radic Biol Med</i> 28: 1451–1455, 2000.                                                                                                                                                                                                                                                                                       | 129                                   |
| 100. | Muller A, Gabriel H, and Sies H. A novel biologically active selenoorganic compound—IV. Protective glutathione-dependent effect of PZ 51 (ebselen) against ADP-Fe induced lipid peroxidation in isolated hepatocytes. <i>Biochem Pharmacol</i> 34: 1185–1189, 1985.                                                                                                                                                                             | 129                                   |
| 101. | Panasenko OM, Sharov VS, Briviba K, and Sies H. Interaction of peroxynitrite with carotenoids in human low density lipoproteins. <i>Arch Biochem Biophys</i> 373: 302–305, 2000.                                                                                                                                                                                                                                                                | 128                                   |
| 102. | Muller A and Sies H. Role of alcohol dehydrogenase activity and the acetaldehyde in ethanol-induced ethane and pentane production by isolated perfused rat liver. <i>Biochem J</i> 206: 153–156, 1982.                                                                                                                                                                                                                                          | 126                                   |
| 103. | Hollman PC, Cassidy A, Comte B, Heinonen M, Richelle M, Richling E, Serafini M, Scalbert A, Sies H, and Vidry S. The biological relevance of direct antioxidant effects of polyphenols for cardiovascular health in humans is not established. <i>J Nutr</i> 141: 989S–1009S, 2011.                                                                                                                                                             | 125                                   |
| 104. | Klotz LO, Schieke SM, Sies H, and Holbrook NJ. Peroxynitrite activates the phosphoinositide 3-kinase/Akt pathway in human skin primary fibroblasts. <i>Biochem J</i> 352 Pt 1: 219–225, 2000.                                                                                                                                                                                                                                                   | 125                                   |
| 105. | Stahl W and Sies H. Carotenoids and protection against solar UV radiation. <i>Skin Pharmacol Appl Skin Physiol</i> 15: 291–296, 2002.                                                                                                                                                                                                                                                                                                           | 123                                   |
| 106. | Schewe T, Sadik C, Klotz L-O, Yoshimoto T, Kühn H, and Sies H. Polyphenols of cocoa: inhibition of mammalian 15-lipoxygenase. <i>Biol Chem Hoppe Seyler</i> 382: 1687–1696, 2001.                                                                                                                                                                                                                                                               | 123                                   |
| 107. | Brigelius R, Lenzen R, and Sies H. Increase in hepatic mixed disulphide and glutathione disulphide levels elicited by paraquat. <i>Biochem Pharmacol</i> 31: 1637–1641, 1982.                                                                                                                                                                                                                                                                   | 119                                   |
| 108. | Heiss C, Finis D, Kleimborgard P, Hoffmann A, Rassaf T, Kelm M, and Sies H. Sustained increase in flow-mediated dilation after daily intake of high-flavanol cocoa drink over 1 week. <i>J Cardiovasc Pharmacol</i> 49: 74–80, 2007.                                                                                                                                                                                                            | 118                                   |
| 109. | Wang JF, Komarov P, Sies H, and de Groot H. Contribution of nitric oxide synthase to luminol-dependent chemiluminescence generated by phorbol-ester-activated Kupffer cells. <i>Biochem J</i> 279 (Pt 1): 311–314, 1991.                                                                                                                                                                                                                        |                                       |

(continued)

TABLE S2. (CONTINUED)

|      | <i>Publication</i>                                                                                                                                                                                                                                                                        | <i>Total citations<br/>as of<br/>6/30/2014</i> |
|------|-------------------------------------------------------------------------------------------------------------------------------------------------------------------------------------------------------------------------------------------------------------------------------------------|------------------------------------------------|
| 110. | Haussinger D, Gerok W, and Sies H. Regulation of flux through glutaminase and glutamine synthetase in isolated perfused rat liver. <i>Biochim Biophys Acta</i> 755: 272–278, 1983.                                                                                                        | 118                                            |
| 111. | Schewe T, Kuhn H, and Sies H. Flavonoids of cocoa inhibit recombinant human 5-lipoxygenase. <i>J Nutr</i> 132: 1825–1829, 2002.                                                                                                                                                           | 117                                            |
| 112. | Wiswedel I, Hirsch D, Kropf S, Gruening M, Pfister E, Schewe T, and Sies H. Flavanol-rich cocoa drink lowers plasma F(2)-isoprostane concentrations in humans. <i>Free Radic Biol Med</i> 37: 411–421, 2004.                                                                              | 119                                            |
| 113. | Di Mascio P, Bechara EJ, Medeiros MH, Briviba K, and Sies H. Singlet molecular oxygen production in the reaction of peroxynitrite with hydrogen peroxide. <i>FEBS Lett</i> 355: 287–289, 1994.                                                                                            | 117                                            |
| 114. | Scharffetter-Kochanek K, Wlaschek M, Briviba K, and Sies H. Singlet oxygen induces collagenase expression in human skin fibroblasts. <i>FEBS Lett</i> 331: 304–306, 1993.                                                                                                                 | 115                                            |
| 115. | Stahl W, Heinrich U, Jungmann H, von Laar J, Schietzel M, Sies H, and Tronnier H. Increased dermal carotenoid levels assessed by noninvasive reflection spectrophotometry correlate with serum levels in women ingesting Betatene. <i>J Nutr</i> 128: 903–907, 1998.                      | 115                                            |
| 116. | Heinrich U, Neukam K, Tronnier H, Sies H, and Stahl W. Long-term ingestion of high flavanol cocoa provides photoprotection against UV-induced erythema and improves skin condition in women. <i>J Nutr</i> 136: 1565–1569, 2006.                                                          | 115                                            |
| 117. | Junghans A, Sies H, and Stahl W. Macular pigments lutein and zeaxanthin as blue light filters studied in liposomes. <i>Arch Biochem Biophys</i> 391: 160–164, 2001.                                                                                                                       | 113                                            |
| 118. | Wlaschek M, Wenk J, Brenneisen P, Briviba K, Schwarz A, Sies H, and Scharffetter-Kochanek K. Singlet oxygen is an early intermediate in cytokine-dependent ultraviolet-A induction of interstitial collagenase in human dermal fibroblasts in vitro. <i>FEBS Lett</i> 413: 239–242, 1997. | 112                                            |
| 119. | Sies H. Total antioxidant capacity: appraisal of a concept. <i>J Nutr</i> 137: 1493–1495, 2007.                                                                                                                                                                                           | 112                                            |
| 120. | Schieke SM, Briviba K, Klotz LO, and Sies H. Activation pattern of mitogen-activated protein kinases elicited by peroxynitrite: attenuation by selenite supplementation. <i>FEBS Lett</i> 448: 301–303, 1999.                                                                             | 110                                            |
| 121. | Kono H, Arteel GE, Rusyn I, Sies H, and Thurman RG. Ebselen prevents early alcohol-induced liver injury in rats. <i>Free Radic Biol Med</i> 30: 403–411, 2001.                                                                                                                            | 108                                            |
| 122. | Roussyn I, Briviba K, Masumoto H, and Sies H. Selenium-containing compounds protect DNA from single-strand breaks caused by peroxynitrite. <i>Arch Biochem Biophys</i> 330: 216–218, 1996.                                                                                                | 106                                            |
| 123. | Murphy ME and Sies H. Visible-range low-level chemiluminescence in biological systems. <i>Methods Enzymol</i> 186: 595–610, 1990.                                                                                                                                                         | 106                                            |
| 124. | Sies H and Moss KM. A role of mitochondrial glutathione peroxidase in modulating mitochondrial oxidations in liver. <i>Eur J Biochem</i> 84: 377–383, 1978.                                                                                                                               | 105                                            |
| 125. | Klotz LO, Schroeder P, and Sies H. Peroxynitrite signaling: receptor tyrosine kinases and activation of stress-responsive pathways. <i>Free Radic Biol Med</i> 33: 737–743, 2002.                                                                                                         | 105                                            |
| 126. | Cadenas E, Sies H, Nastainczyk W, and Ullrich V. Singlet oxygen formation detected by low-level chemiluminescence during enzymatic reduction of prostaglandin G2 to H2. <i>Hoppe Seylers Z Physiol Chem</i> 364: 519–528, 1983.                                                           | 105                                            |
| 127. | Häussinger D, Gerok W, and Sies H. Hepatic role in pH regulation: role of the intercellular glutamine cycle. <i>Trends Biochemical Sciences</i> 9: 300–302, 1984.                                                                                                                         | 102                                            |
| 128. | Hansberg W, de Groot H, and Sies H. Reactive oxygen species associated with cell differentiation in <i>Neurospora crassa</i> . <i>Free Radic Biol Med</i> 14: 287–293, 1993.                                                                                                              | 102                                            |
| 129. | Grune T, Klotz LO, Gieche J, Rudeck M, and Sies H. Protein oxidation and proteolysis by the nonradical oxidants singlet oxygen or peroxynitrite. <i>Free Radic Biol Med</i> 30: 1243–1253, 2001.                                                                                          | 102                                            |

(continued)

TABLE S2. (CONTINUED)

|      | <i>Publication</i>                                                                                                                                                                                                                                                                                                | <i>Total citations<br/>as of<br/>6/30/2014</i> |
|------|-------------------------------------------------------------------------------------------------------------------------------------------------------------------------------------------------------------------------------------------------------------------------------------------------------------------|------------------------------------------------|
| 130. | Stahl W, Heinrich U, Aust O, Tromnier H, and Sies H. Lycopene-rich products and dietary photoprotection. <i>Photochem Photobiol Sci</i> 5: 238–242, 2006.                                                                                                                                                         | 102                                            |
| 131. | Hansberg W, de Groot H, and Sies H. Reactive oxygen species associated with cell differentiation in <i>Neurospora crassa</i> . <i>Free Radic Biol Med</i> 14: 287–293, 1993.                                                                                                                                      | 102                                            |
| 132. | Grether-Beck S, Bonizzi G, Schmitt-Brenden H, Felsner I, Timmer A, Sies H, Johnson JP, Piette J, and Krutmann J. Non-enzymatic triggering of the ceramide signalling cascade by solar UVA radiation. <i>EMBO J</i> 19: 5793–5800, 2000.                                                                           | 100                                            |
| 133. | Brenneisen P, Oh J, Wlaschek M, Wenk J, Briviba K, Hommel C, Herrmann G, Sies H, and Scharffetter-Kochanek K. Ultraviolet B wavelength dependence for the regulation of two major matrix-metalloproteinases and their inhibitor TIMP-1 in human dermal fibroblasts. <i>Photochem Photobiol</i> 64: 877–885, 1996. | 100                                            |
| 134. | Abdelmohsen K, Gerber PA, von Montfort C, Sies H, and Klotz LO. Epidermal growth factor receptor is a common mediator of quinone-induced signaling leading to phosphorylation of connexin-43: role of glutathione and tyrosine phosphatases. <i>J Biol Chem</i> 278: 38360–38367, 2003.                           | 100                                            |
